# Supplementary material
Source: publisher figshare collection journal article supplement (https://acs.figshare.com/ndownloader/files/3851497)
Supplement: Supplementary file 1 [file 3851497]

## Supporting Information

### **Polyaniline-decorated {001} facets of Bi<sub>2</sub>O<sub>2</sub>CO<sub>3</sub> nanosheets: in situ oxygen vacancy formation and enhanced visible light photocatalytic activity**

*Ziyan Zhao,<sup>ab</sup> Ying Zhou,<sup>\*ab</sup> Fang Wang,<sup>b</sup> Kunhao Zhang,<sup>c</sup> Shan Yu,<sup>b</sup> and Kun Cao<sup>b</sup>*

<sup>a)</sup> State Key Laboratory of Oil and Gas Reservoir and Exploitation, Southwest Petroleum University, Chengdu 610500, China

<sup>b)</sup> School of Materials Science and Engineering, Southwest Petroleum University, Chengdu 610500, China

<sup>c)</sup> Shanghai Synchrotron Radiation Facility, Shanghai Institute of Applied Physics, Chinese Academy of Sciences, Shanghai 201204, China

\*To whom correspondence should be addressed

Tel: + 86 28 83037411; Fax: +86 28 83037406

Email: [yzhou@swpu.edu.cn](mailto:yzhou@swpu.edu.cn) (Y. Zhou)

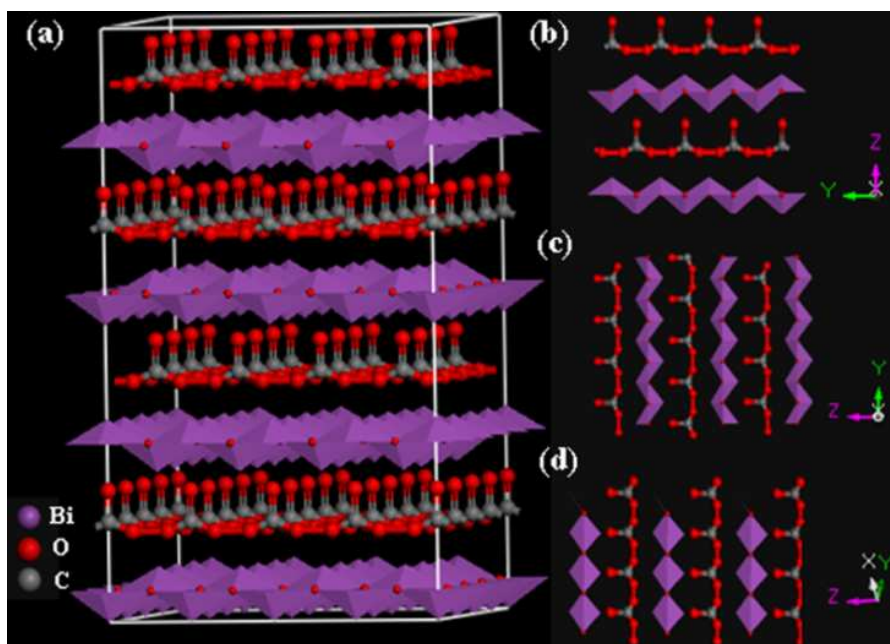

**Figure S1.** Schematic crystal structure of  $\text{Bi}_2\text{O}_2\text{CO}_3$  using Imm2 space group (a); side view of the (001) facet (b), (010) facet (c) and (110) facet (d).

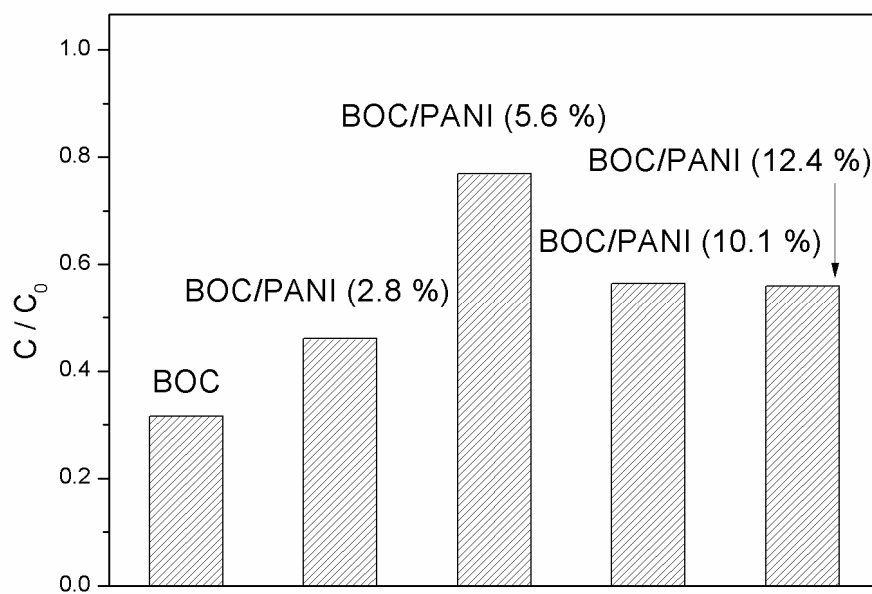

**Figure S2.** The adsorption of RhB over BOC and BOC/PANI samples in the dark.

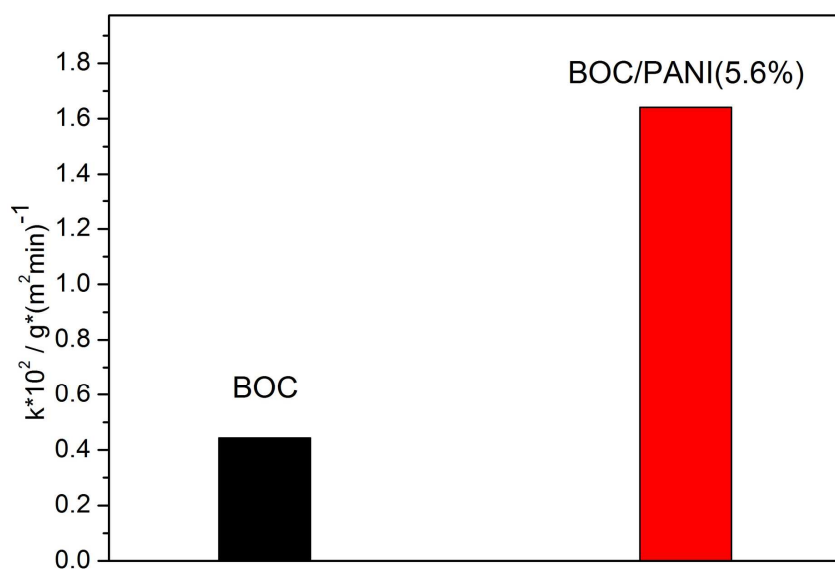

**Figure S3.** The comparison of reaction rate constants which have been normalized to the specific surface area

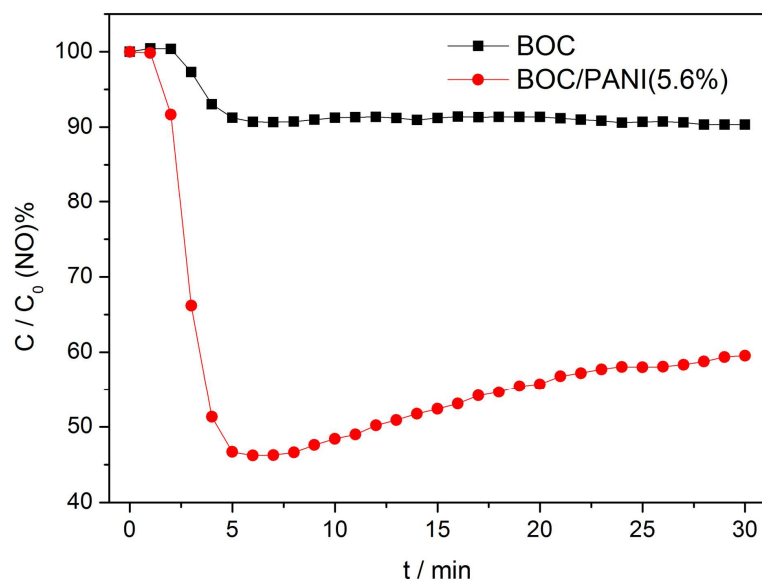

**Figure S4.** The variation of NO concentration ( $C/C_0$  %) with irradiation time over BOC and BOC/PANI (5.6%) under visible light irradiation.

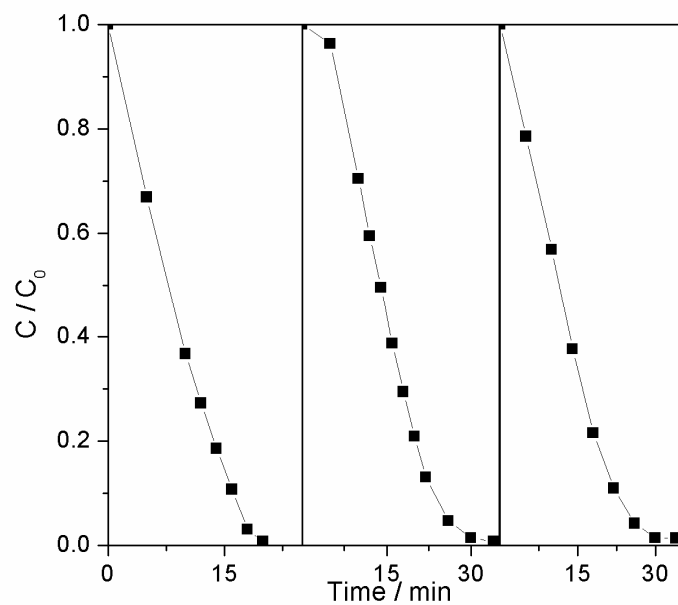

**Figure S5.** Cycling experiments on the photocatalytic degradation of RhB in the presence of BOC/PANI (5.6%) under visible light irradiation

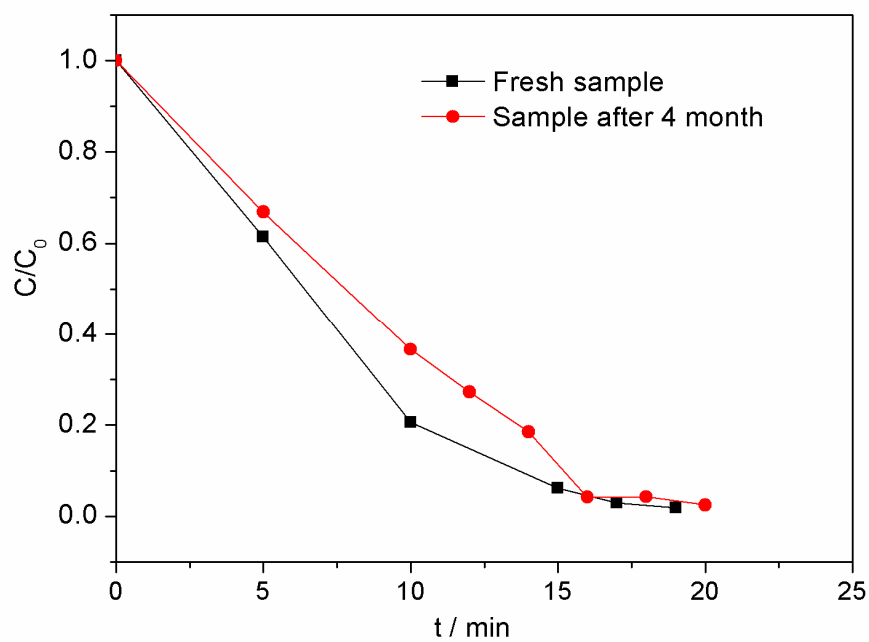

**Figure S6.** The comparison of photodegradation of RhB over fresh sample and sample after exposing in air for four months.

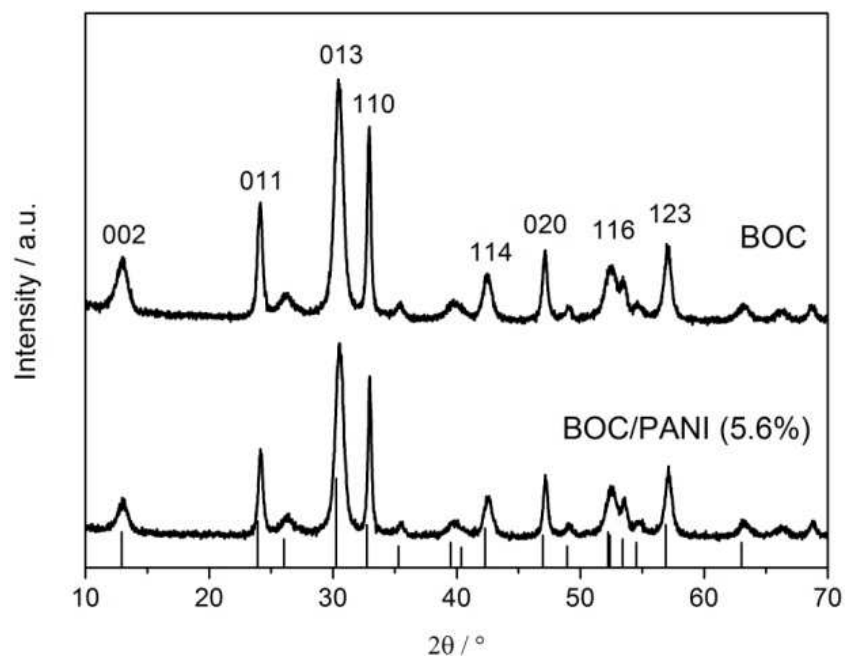

**Figure S7.** PXRD patterns of pristine BOC and BOC/PANI (5.6%) composite. The reference pattern of tetragonal  $\text{Bi}_2\text{O}_2\text{CO}_3$  (JCPDS No. 41-1488) is shown at the bottom.

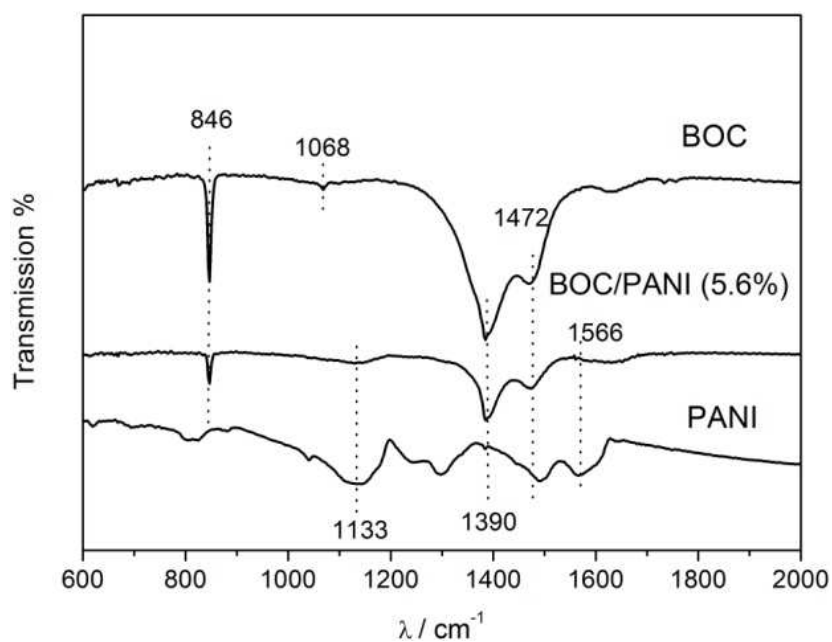

**Figure S8.** FT-IR spectrum of BOC, PANI and BOC/PANI (5.6%).

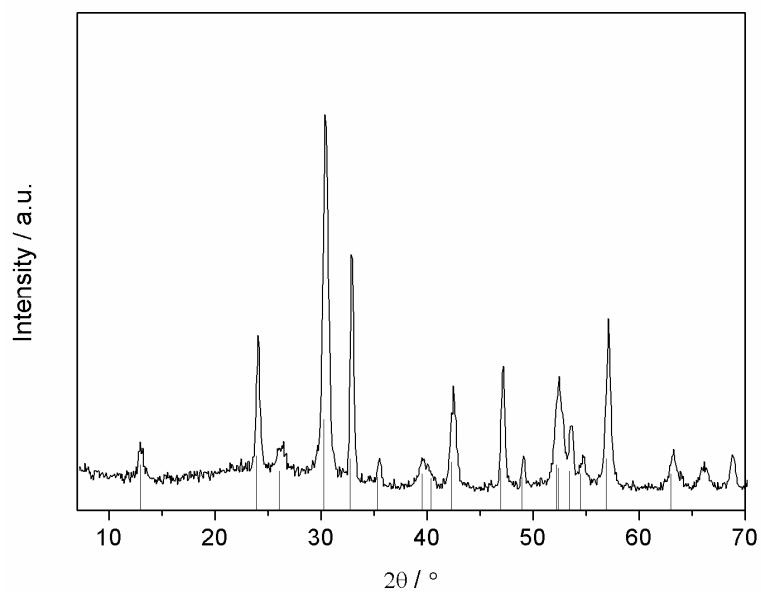

**Figure S9.** PXRD patterns of BOC/PANI (5.6%) after cycling experiments.

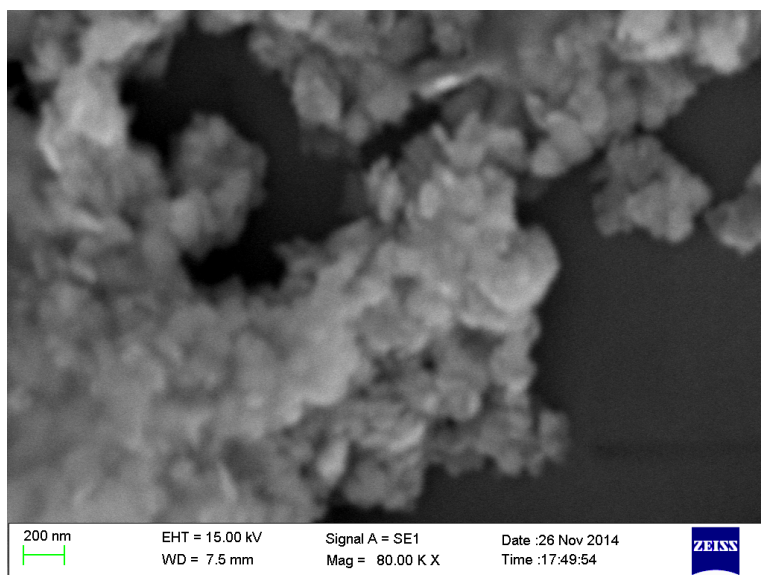

**Figure S10.** SEM image of BOC/PANI (5.6%) after cycling experiments.

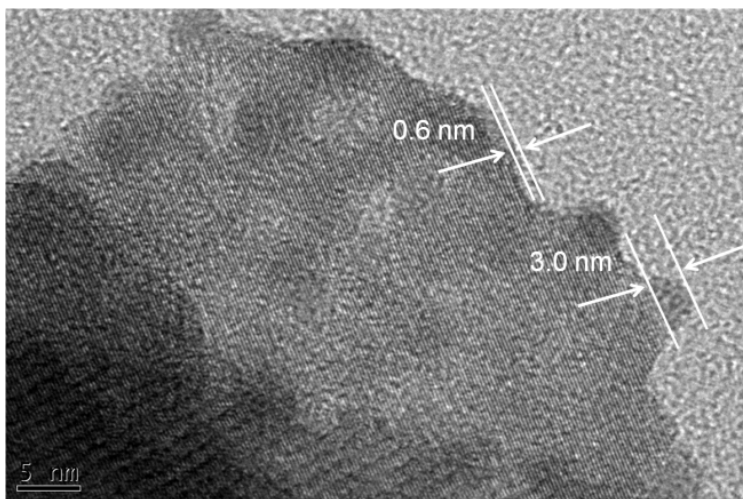

**Figure S11.** HRTEM image of BOC/PANI (5.6%).

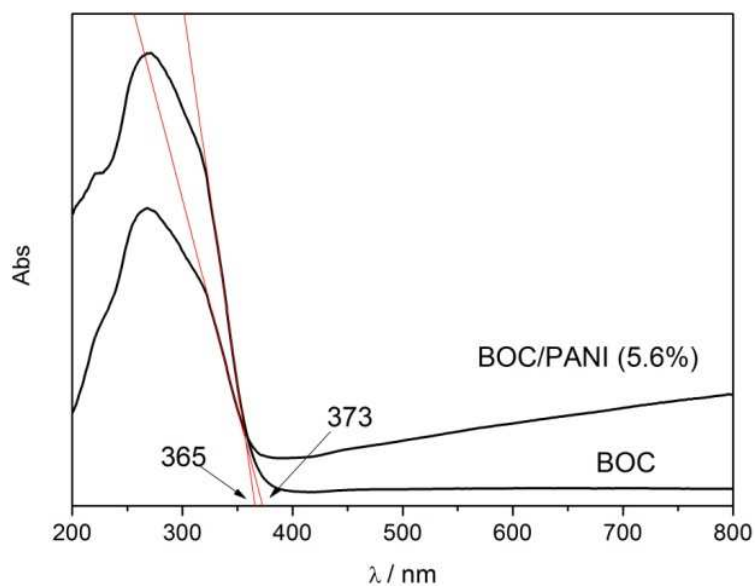

**Figure S12.** The UV-Vis diffuse reflectance spectra of BOC and BOC/PANI (5.6%).

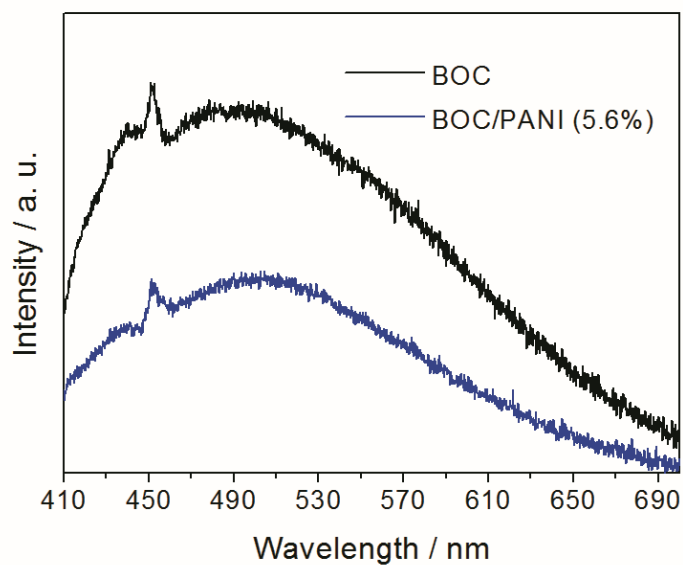

**Figure S13.** PL spectra of BOC and BOC/PANI (5.6%).

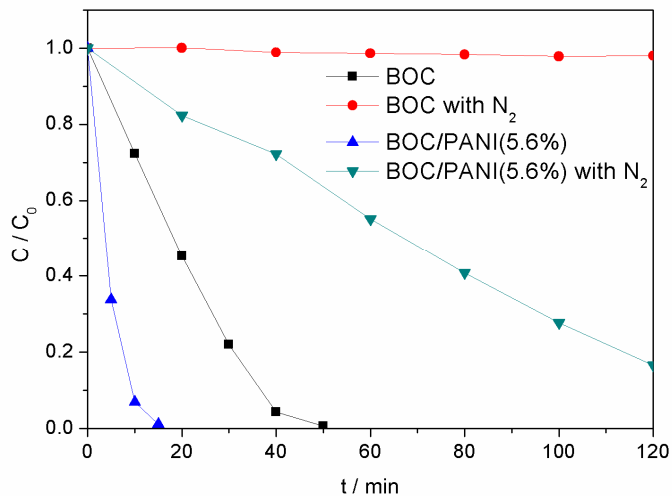

**Figure S14.** Photodegradation of RhB over BOC and BOC/PANI (5.6%) under conventional condition and with N<sub>2</sub> bubbling into the solution.



**Table S1.** The fitting values from the equivalent circuit model

| <b>samples</b>                    | <b>R<sub>1</sub></b> | <b>C<sub>1</sub></b> | <b>R<sub>2</sub></b> | <b>CPE1-T</b> | <b>CPE1-P</b> | <b>R<sub>3</sub></b> |
|-----------------------------------|----------------------|----------------------|----------------------|---------------|---------------|----------------------|
| BOC                               | 63.57                | 7.7658E-6            | 36.67                | 9.9134E-6     | 0.98          | 2.5374E7             |
| BOC under irradiation             | 47.86                | 8.3521E-6            | 45.73                | 1.0268E-5     | 0.97389       | 1.9153E6             |
| BOC/PANI (5.6%)                   | 84.04                | 7.4156E-6            | 24.56                | 1.415E-5      | 0.95989       | 4.4988E6             |
| BOC/PANI (5.6%) under irradiation | 85.57                | 7.3561E-6            | 24.45                | 1.4462E-5     | 0.95781       | 1.5298E6             |

R1: the resistance of the solution;

R2: the resistance of the counter electrode;

C1: the capacitance of the counter electrode;

R3: the resistance of work electrode (BOC or BOC/PANI (5.6%));

CPE1-T/CPE1-P: the deviation of constant phase angle (the value is close to 1 representing a trend to fabricate a double-layer electric)
